# Supplementary material
Source: HighWire-hosted journal article supplement (https://erj.ersjournals.com/content/55/3/1901935)
Supplement: inline-supplementary-material-1 [file inline-supplementary-material-1.pdf]

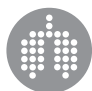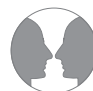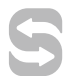

SHAREABLE PDF

# WHO 2019 guidelines on drug-resistant tuberculosis treatment: based on evidence or expert opinion?

Lorenzo Guglielmetti <sup>1,2</sup>, Helena Huerga<sup>3</sup>, Uzma Khan<sup>4</sup> and Francis Varaine<sup>1</sup>

**Affiliations:** <sup>1</sup>Médecins Sans Frontières, Paris, France. <sup>2</sup>APHP, Sorbonne Université, Site Pitié-Salpêtrière, Centre National de Référence des Mycobactéries et de la Résistance des Mycobactéries aux Antituberculeux, Sorbonne Université, INSERM, U1135, Centre d'Immunologie et des Maladies Infectieuses, Cimi-Paris, équipe 2, Paris, France. <sup>3</sup>Epicentre, Paris, France. <sup>4</sup>Interactive Research and Development, Dubai, UAE.

**Correspondence:** Lorenzo Guglielmetti, MSF France, Medical Department, 14-34 avenue Jean Jaurès, 75019 Paris, France. E-mail: [lorenzo.guglielmetti@paris.msf.org](mailto:lorenzo.guglielmetti@paris.msf.org)

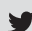

@ERSpublications

World Health Organization guidelines on drug-resistant tuberculosis should make a clear distinction between evidence, expert opinion and assumptions to allow appreciation of the uncertainty around the recommendations <http://bit.ly/2FHxmyW>

**Cite this article as:** Guglielmetti L, Huerga H, Khan U, *et al.* WHO 2019 guidelines on drug-resistant tuberculosis treatment: based on evidence or expert opinion? *Eur Respir J* 2020; 55: 1901935 [<https://doi.org/10.1183/13993003.01935-2019>].

This single-page version can be shared freely online.

## To the Editor:

Since 2011, the World Health Organization (WHO) has used the Grading of Recommendations Assessment, Development, and Evaluation (GRADE) system for grading quality of evidence [1, 2] to update guidelines for the management of drug-resistant tuberculosis (DR-TB). This represents an undeniable improvement towards evidence-based recommendations compared to previous guidelines, which were primarily based on expert opinion [3]. However, some aspects of guideline development remain unclear. In our opinion, the WHO 2019 consolidated guidelines on DR-TB treatment [4] have raised some concerns in the way recommendations were drawn from the evidence evaluated to answer specific PICO (Patient, Intervention, Comparator, Outcome) questions.
